# 1 CrossTalker: Analysis and Visualisation of Ligand 2 Receptor Networks

3 James S. Nagai<sup>1</sup>, Nils B. Leimkühler<sup>2</sup>, Michael T. Schaub<sup>3</sup>, Rebekka K. Schneider<sup>4,5,6</sup>, and  
4 Ivan G. Costa<sup>1,\*</sup>

5 <sup>1</sup>Institute for Computational Genomics, Joint Research Center for Computational Biomedicine, RWTH Aachen  
6 University Medical School, Germany

7 <sup>2</sup>Department of Hematology and Stem Cell Transplantation, University Hospital Essen, Germany

8 <sup>3</sup>Department of Computer Science, RWTH Aachen University, Germany

9 <sup>4</sup>Department of Hematology, Erasmus Medical Center, the Netherlands

10 <sup>5</sup>Department of Cell Biology, Institute for Biomedical Engineering, Faculty of Medicine, RWTH Aachen University,  
11 Germany

12 <sup>6</sup>Oncode Institute, Erasmus Medical Center, the Netherlands

13 \*ivan.costa@rwth-aachen.de

## 14 ABSTRACT

**Motivation:** Ligand-receptor (LR) network analysis allows the characterization of cellular crosstalk based on single cell RNA-seq data. However, current methods typically provide a list of inferred LR interactions and do not allow the researcher to focus on specific cell types, ligands or receptors. In addition, most of these methods cannot quantify changes in crosstalk between two biological phenotypes.

15 **Results:** CrossTalker is a framework for network analysis and visualisation of LR interactions. CrossTalker identifies relevant ligands, receptors and cell types contributing to changes in cell communication when contrasting two biological phenotypes, i.e. disease vs. homeostasis. A case study on scRNA-seq of human myeloproliferative neoplasms reinforces the strengths of CrossTalker for characterisation of changes in cellular crosstalk in disease.

**Availability and Implementation:** CrosstalkR is an R package available at <https://github.com/CostaLab/CrossTalker>.

## 16 1 Introduction

17 Understanding cellular crosstalk is vital for uncovering molecular mechanisms associated to cell differentiation and  
18 disease progression. Single cell RNA sequencing (scRNA-seq) enables the characterization of tissue heterogeneity  
19 at an unprecedented level<sup>1,2</sup>. However, information of cellular proximity and crosstalk is not directly captured by

20 common single cell sequencing protocols. Computational methods, which search for pairs of cell types expressing  
21 compatible ligand-receptor (LR) pairs, have thus become a powerful approach for dissecting cellular crosstalk from  
22 scRNA-seq data<sup>2</sup>. Current state-of-art LR inference methods, such as CellphoneDB (CPDB)<sup>3</sup>, basically provide a  
23 ranked list of hundreds of ligand-receptor and cell pairs for a given scRNA-seq dataset. As interpreting such ranked  
24 lists is challenging, this calls for tools to simplify the complexity of these results, i.e., ranking of cell types or genes  
25 within a pair of cell types. Also, most LR inference methods focus on the analysis of a single phenotype scRNA-seq  
26 experiment and are not able to characterize changes in cellular crosstalk between pairs of phenotypes, e.g., disease  
27 vs. homeostasis.

28 To fill these gaps, we developed CrossTalker, which aggregates predictions from CPDB<sup>3</sup> as cell and cell/gene  
29 networks. First it ranks cell types, cell-receptors and cell-ligand pairs regarding their importance in cellular crosstalk  
30 based on certain network topology measures. Second, CrossTalker enables researchers to perform a phenotype  
31 based comparative LR analysis. CrossTalker thus complements available methods being the only approach exploring  
32 LR networks at both cell and cell-gene levels and by contrasting these networks at pairs of phenotypes (see Supp.  
33 Material for an overview of competing methods). CrossTalker is implemented as an R package. It presents the  
34 results either graphically or in tabular form summarized as a HTML report/PDF report and stores all results in an R  
35 container to foster data sharing and reproducibility of results.

## 36 **2 Overview and implementation**

37 The input to CrossTalker is a data-table, in which each line has five columns consisting of i) a ligand, ii) a receptor,  
38 iii) a sender cell type that expresses the ligand, iv) a receiver cell type that expresses the receptor, and v) a positive  
39 score associated with the weight of the interaction, e.g., as predicted by CPDB<sup>3</sup>. Specifically, for CPDB this positive  
40 score (weight) corresponds to a function of the mean expression levels of the ligand and the receptor within the  
41 respective cell types<sup>3</sup>. From this input data, CrossTalker builds network representations and estimates node statistics  
42 to highlight particular cells or cell/gene pairs. All the analyses can be performed either on data corresponding to a  
43 single phenotype, or data from two phenotypes can be compared.

### 44 **2.1 Network Construction**

45 CrossTalker constructs two representations of the LR network: a cell-cell interaction (CCI) network and a cell-gene  
46 interaction (CGI) network. In the CCI network, the nodes are defined by each cell-type and the directed edges are  
47 weighted by characteristics of the interactions, e.g., number of LR pairs and sum of weights of LR pairs. In the  
48 CGI network, the nodes represent gene and cell pairs (ligand with sender cell type, or receptor with receiving cell

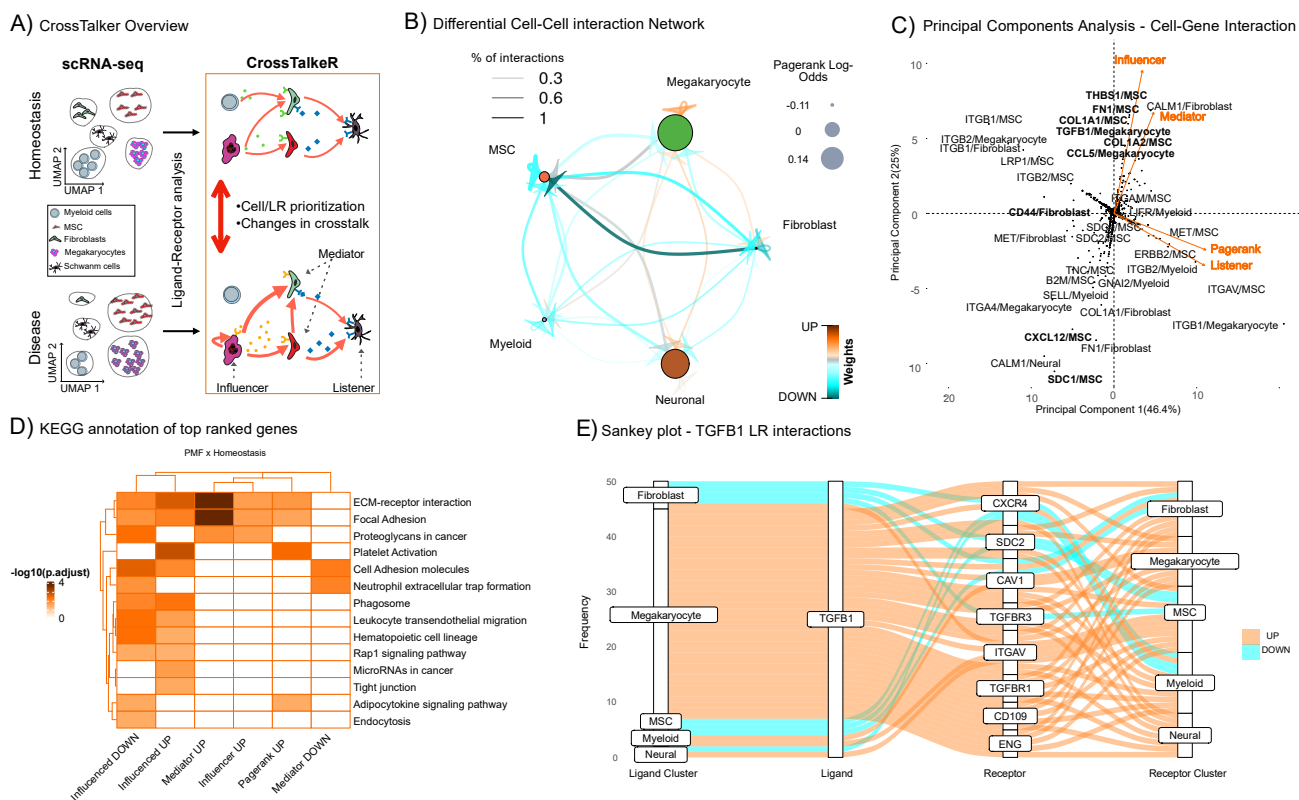

**Figure 1.** A) CrossTalker scheme: given a pair of scRNA-seq, CrossTalker creates cell-cell networks (or cell-gene networks), where edge weights are proportional to the expression of ligand-receptors driving communication between the cells. Network topology measure are used to find nodes sending signals (influencers), nodes receiving signals (listener) or both (mediators). Moreover, random-walks estimates with pagerank indicate the importance of network nodes. These measures can be computed for each phenotype individually or in the comparative analyses. B) Comparative Cell-Cell Interaction (CCI), where node size (edge thickness) represents importance of the cell (communication between cells). C) PCA representation of nodes from the Cell Gene Interaction (CGI) based on comparative topological measures. We highlight cell-gene pairs with deviating PCA scores. Only directions associated to positive values are shown (negative values are in opposing order). D) KEGG pathway enrichment provide further insights of genes associated to distinct topological measures (influencer, listener, mediator and node importance) with increase/decrease in disease vs. control (up/down). E) Sankey plot listing all predicted source, receptor and receiver interactions associated with a gene of interest, i.e. TGFβ1

49 type) and the edge weights are given by the mean LR expression levels. Edges are always directed from ligands to  
 50 receptors.

## 51 2.2 Network topological measures

52 We use graph theoretic tools to rank nodes (cell types or cell-gene pairs of the CCI (and CGI) network. We compute  
 53 the following scores (see supplementary material for details):

- 54 • *Influencer score.* We compute the number of out-going edges, i.e., the number of signals sent by a cell.
- 55 • *Listener score.* We compute the number of in-going edges per node. Nodes with high listener score represent

56 nodes that receive many signals under the studied biological condition.

- 57 • *Moderator score.* We compute the betweenness centrality of a node to measure the importance of a node to  
58 mediate communication between cells.
- 59 • *Importance score.* We characterize the overall *importance* of nodes within the network by computing their  
60 *PageRank* score. Note that the *PageRank* can be interpreted probabilistically as the stationary probability  
61 distribution of a certain diffusion process on the network.

62 When comparing two different phenotypes, we obtain differential scores as follows. For the influencer, listener,  
63 and moderator scores we simply compute the score difference for each node. For importance (pagerank), we compute  
64 log-odds of posteriors probabilities estimated via the pagerank scores.

65 **HTML/PDF report and graphical representations:** CrossTalker creates graphical and tabular representa-  
66 tions in the form of a HTML/PDF report. This includes representations of the CCI networks, where edge thickness,  
67 color and node sizes represent their characteristics (Fig. 1B). CrossTalker generates PCA plots on the node fea-  
68 ture space to describe GCI nodes. It highlights nodes with deviating PCA scores, i.e. nodes outside the 95%  
69 confidence interval assuming PCA values are normally distributed (Fig. 1C). CrossTalker also provides a pathway  
70 characterization (KEGG pathway enrichment analysis) of top ligand/receptors per node feature to support functional  
71 interpretation of results (Fig. 1D). Moreover, it is possible to list all interactions associated within a particular ligand  
72 or receptor via a Sankey plot (Fig. 1E). The report also includes tabular representation of rankings, which can be  
73 sorted by distinct criteria or searched for particular genes and PC analysis. All results can be exported to spreadsheet  
74 formats. The package also produces an R object, which can be used for generation of further graphs, i.e. generation  
75 of Sankey plots of ligand or receptors of interest or simplification of plots by filtering ligand, receptors or cells.  
76 The software is provided as an open source package (<https://github.com/CostaLab/CrossTalker>).  
77 This includes a tutorial to integrate the tool with ligand-receptor analysis tools such as CPDB, as well as example  
78 code to reproduce the analysis of stromal cells in human myelofibrosis<sup>4</sup>.

### 79 **3 Case study: Cellular crosstalk in myelofibrosis**

80 Here we revisit the scRNAseq analysis comparing bone marrow stromal cells in myelofibrosis (MF) to those in  
81 homeostasis<sup>4</sup>. In the comparative CCI network graph (Fig. 1B) megakaryocytes (MK) show a high number of  
82 up-regulated autocrine and intercellular interactions. This results in a high pagerank log-odds for this cell population  
83 clearly highlighting MK as the most important signaling cells in this disease influencing a plethora of bone marrow  
84 cells such as neural cells and MSCs. We also observe a significant loss of interactions involving MSCs and fibroblasts

85 compared to homeostasis. This is in line with the restricted myofibroblastic phenotype MSCs have been described to  
86 acquire. MSCs are usually strongly interconnected, moderating the quiescence and differentiation of hematopoietic  
87 cells, but lose this capacity as myelofibrosis progresses<sup>4,5</sup>. PCA analysis of the CGI network (Fig. 1C) highlights  
88 matrix related proteins (*FNI*, *THBS1*, *COL1A1*), which are secreted by MSCs, and *TGFB1*, which is secreted by MK,  
89 to act as both influencers and mediators in myelofibrosis. These results are in accordance with known mechanisms  
90 associated to MF, e.g. the crosstalk between MK and MSCs via TGF $\beta$  signalling; and the deposition on matrix via  
91 MSC cells<sup>6</sup>. Exploration of *TGFB1*-mediated LR-interactions in the dataset as provided by CrossTalker also gives  
92 into the differential intercellular signaling present in the myelofibrotic bone marrow (Fig. 1E). The strong upregulation  
93 of *TGFB1*-*TGFB1R* between MK and MSCs is in line with other publications, showing canonical *TGFB1*-signaling  
94 as most dominant pro-fibrotic element<sup>7</sup>. At the same time, differential expression of co-receptors *CD109* and *ENG*  
95 show, how *TGFB1*-signals are modulated in MF<sup>8,9</sup>. Thus, CrossTalker manages to capture the multiplicity of  
96 signals expected to be present in biological networks at any given point in time. Similarly, a downregulation of  
97 the interaction between *TGFB1* and *TGFR3*, an endogenous decoy receptor preventing downstream signaling,  
98 also indicates an additional way how *TGFB1*-signals are increased in MF<sup>10</sup>. Similarly, *CXCL12*/MSC, a pivotal  
99 mediator of hematopoietic homing, is the node with the strongest decrease in the influencer score in disease. This  
100 is in line with the findings of the CCI and previously published data showing an extensive loss of hematopoiesis  
101 supporting capacities in myelofibrotic MSCs<sup>6</sup>. KEGG pathway analysis (Fig. 1D) supports these interpretations  
102 with up-regulated mediators and influencers mostly being enriched for ECM<sup>1</sup> deposition, while down-regulated  
103 influenced nodes are associated with hematopoiesis and leukocyte migration. LR analysis with CrossTalker also  
104 revealed that genes with increased importance are enriched for the KEGG pathway "platelet activation" (Fig. 1D).  
105 This recapitulates the finding that platelet related mediators such as *CXCL4* contribute to the perpetual inflammatory  
106 environment in myelofibrosis<sup>11</sup>. Taken together, these examples comprehensively illustrate how CrossTalker can  
107 characterize changes in the diverse cellular crosstalk between conditions from scRNAseq data.

## 108 4 Conclusion and Future Work

109 CrossTalker is a comprehensive framework for network analysis of LR interactions, and enables comparisons  
110 between LR interactions of two biological phenotypes. CrossTalker provides both graphical report, tabular data and  
111 R objects enabling both interpretable and reproducible analysis. Future work includes the extension of network-based  
112 method analysis as well as the analysis of more complex experimental designs as time series or the comparison of  
113 several biological conditions.

---

<sup>1</sup>ECM: Extra Cellular Matrix

## 114 Funding

115 This project has been funded by the clinical research unit CRU344 supported by the German Research Foundation  
116 (DFG) and the E:MED Consortia Fibromap funded by the German Ministry of Education and Science (BMBF).

## 117 References

- 118 1. Luecken, M. D. & Theis, F. J. Current best practices in single-cell rna-seq analysis: a tutorial. *Molecular*  
119 *systems biology* **15**, e8746 (2019).
- 120 2. Armingol, E., Officer, A., Harismendy, O. & Lewis, N. E. Deciphering cell-cell interac-  
121 tions and communication from gene expression. *Nature reviews. Genetics* epub (2020). URL  
122 <http://www.nature.com/articles/s41576-020-00292-x><http://www.ncbi.nlm.nih.gov/pubmed/33168968>[http://www.pubmedcentral.nih.gov/articlerender.fcgi?](http://www.pubmedcentral.nih.gov/articlerender.fcgi?artid=PMC7649713)  
123 [artid=PMC7649713](http://www.pubmedcentral.nih.gov/articlerender.fcgi?artid=PMC7649713).  
124
- 125 3. Efremova, M., Vento-Tormo, M., Teichmann, S. A. & Vento-Tormo, R. CellPhoneDB v2.0: Inferring cell-cell  
126 communication from combined expression of multi-subunit receptor-ligand complexes (2019).
- 127 4. Leimkühler, N. B. *et al.* Heterogeneous bone-marrow stromal progenitors drive myelofibrosis via a druggable  
128 alarmin axis. *Cell Stem Cell* (2020). URL [http://www.sciencedirect.com/science/article/](http://www.sciencedirect.com/science/article/pii/S1934590920305427)  
129 [pii/S1934590920305427](http://www.sciencedirect.com/science/article/pii/S1934590920305427).
- 130 5. Schneider, R. K. *et al.* Gli1+ mesenchymal stromal cells are a key driver of bone marrow fibrosis and an  
131 important cellular therapeutic target. *Cell stem cell* **20**, 785–800 (2017).
- 132 6. Gleitz, H. F., Kramann, R. & Schneider, R. K. Understanding deregulated cellular and molecular dynamics  
133 in the haematopoietic stem cell niche to develop novel therapeutics for bone marrow fibrosis. *The Journal of*  
134 *Pathology* **245**, 138–146 (2018). URL [https://onlinelibrary.wiley.com/doi/abs/10.1002/](https://onlinelibrary.wiley.com/doi/abs/10.1002/path.5078)  
135 [path.5078](https://onlinelibrary.wiley.com/doi/abs/10.1002/path.5078). <https://onlinelibrary.wiley.com/doi/pdf/10.1002/path.5078>.
- 136 7. Teodorescu, P. *et al.* Transforming growth factor  $\beta$ -mediated micromechanics modulates disease progression in  
137 primary myelofibrosis. *Journal of Cellular and Molecular Medicine* **24**, 11100–11110 (2020).
- 138 8. Bizet, A. A. *et al.* The  $\text{tgf-}\beta$  co-receptor, cd109, promotes internalization and degradation of  $\text{tgf-}\beta$  receptors.  
139 *Biochimica et Biophysica Acta (BBA)-Molecular Cell Research* **1813**, 742–753 (2011).
- 140 9. Schoonderwoerd, M. J., Goumans, M.-J. T. & Hawinkels, L. J. Endoglin: Beyond the endothelium. *Biomolecules*  
141 **10**, 289 (2020).

- 142 **10.** Andres, J. L., Stanley, K., Cheifetz, S. & Massagué, J. Membrane-anchored and soluble forms of betaglycan,  
143 a polymorphic proteoglycan that binds transforming growth factor-beta. *The Journal of cell biology* **109**,  
144 3137–3145 (1989).
- 145 **11.** Gleitz, H. F. *et al.* Increased cxcl4 expression in hematopoietic cells links inflammation and progression of bone  
146 marrow fibrosis in mpn. *Blood, The Journal of the American Society of Hematology* **136**, 2051–2064 (2020).
